# Supplementary material for: LHP1-mediated epigenetic buffering of subgenome diversity and defense responses confers genome plasticity and adaptability in allopolyploid wheat
Source: PubMed Central journal article supplement (PMC10661560; doi:10.1038/s41467-023-43178-2), 2023-11-20
Supplement: 41467_2023_43178_MOESM3_ESM.pdf [file 41467_2023_43178_MOESM3_ESM.pdf]

### **Description of Additional Supplementary Files**

**Supplemental Data 1.** Enrichment and significance of TF targets in sc-triads and non-sc-homoeologs. (TF targets > 10 genes)

**Supplemental Data 2.** Replicated data in this study.
