# Supplementary material for: LHP1-mediated epigenetic buffering of subgenome diversity and defense responses confers genome plasticity and adaptability in allopolyploid wheat
Source: PubMed Central journal article supplement (PMC10661560; doi:10.1038/s41467-023-43178-2), 2023-11-20
Supplement: 41467_2023_43178_MOESM6_ESM.pdf [file 41467_2023_43178_MOESM6_ESM.pdf]

## Reporting Summary

Nature Portfolio wishes to improve the reproducibility of the work that we publish. This form provides structure for consistency and transparency in reporting. For further information on Nature Portfolio policies, see our [Editorial Policies](#) and the [Editorial Policy Checklist](#).

### Statistics

For all statistical analyses, confirm that the following items are present in the figure legend, table legend, main text, or Methods section.

- |                                     |                                                                                                                                                                                                                                                                                                |
|-------------------------------------|------------------------------------------------------------------------------------------------------------------------------------------------------------------------------------------------------------------------------------------------------------------------------------------------|
| n/a                                 | Confirmed                                                                                                                                                                                                                                                                                      |
| <input type="checkbox"/>            | <input checked="" type="checkbox"/> The exact sample size ( $n$ ) for each experimental group/condition, given as a discrete number and unit of measurement                                                                                                                                    |
| <input type="checkbox"/>            | <input checked="" type="checkbox"/> A statement on whether measurements were taken from distinct samples or whether the same sample was measured repeatedly                                                                                                                                    |
| <input checked="" type="checkbox"/> | <input type="checkbox"/> The statistical test(s) used AND whether they are one- or two-sided<br><i>Only common tests should be described solely by name; describe more complex techniques in the Methods section.</i>                                                                          |
| <input checked="" type="checkbox"/> | <input type="checkbox"/> A description of all covariates tested                                                                                                                                                                                                                                |
| <input checked="" type="checkbox"/> | <input type="checkbox"/> A description of any assumptions or corrections, such as tests of normality and adjustment for multiple comparisons                                                                                                                                                   |
| <input type="checkbox"/>            | <input checked="" type="checkbox"/> A full description of the statistical parameters including central tendency (e.g. means) or other basic estimates (e.g. regression coefficient) AND variation (e.g. standard deviation) or associated estimates of uncertainty (e.g. confidence intervals) |
| <input checked="" type="checkbox"/> | <input type="checkbox"/> For null hypothesis testing, the test statistic (e.g. $F$ , $t$ , $r$ ) with confidence intervals, effect sizes, degrees of freedom and $P$ value noted<br><i>Give <math>P</math> values as exact values whenever suitable.</i>                                       |
| <input checked="" type="checkbox"/> | <input type="checkbox"/> For Bayesian analysis, information on the choice of priors and Markov chain Monte Carlo settings                                                                                                                                                                      |
| <input checked="" type="checkbox"/> | <input type="checkbox"/> For hierarchical and complex designs, identification of the appropriate level for tests and full reporting of outcomes                                                                                                                                                |
| <input checked="" type="checkbox"/> | <input type="checkbox"/> Estimates of effect sizes (e.g. Cohen's $d$ , Pearson's $r$ ), indicating how they were calculated                                                                                                                                                                    |

*Our web collection on [statistics for biologists](#) contains articles on many of the points above.*

### Software and code

Policy information about [availability of computer code](#)

|                 |                                                                                                                                                                                                                                                                                                                                                                                                                                                                                            |
|-----------------|--------------------------------------------------------------------------------------------------------------------------------------------------------------------------------------------------------------------------------------------------------------------------------------------------------------------------------------------------------------------------------------------------------------------------------------------------------------------------------------------|
| Data collection | The libraries of H3K27me3 ChIP-seq data were sequenced with the Illumina NovaSeq 6000 system to produce 150-bp paired-end reads. The libraries of LHP1 ChIP-seq data were sequenced with HiSeq-PE150 to produce 150 bp paired-end reads. The libraries of RNA-seq data were sequenced with the Illumina NovaSeq 6000 system to produce 150-bp paired-end reads. Scripts are available at <a href="https://github.com/yuyun-zhang/hexa_LHP1">https://github.com/yuyun-zhang/hexa_LHP1</a> . |
| Data analysis   | fastp (version 0.20.0); Trim Galore (version 0.4.4); Burrows–Wheeler Aligner (version 0.7.17-r1188); HISAT2 (version 2.2.1); MACS (version 2.2.6); featureCount program of the Subread package (version 2.0.0); MAAnorm2 (version 1.0.0); mummer (version 4.0.0beta2); MCScanX python version (version 1.0); VCFtools (version 0.1.13); Orthofinder(version 2.3.12); Integrative Genomics Viewer (version 2.8.10)                                                                          |

For manuscripts utilizing custom algorithms or software that are central to the research but not yet described in published literature, software must be made available to editors and reviewers. We strongly encourage code deposition in a community repository (e.g. GitHub). See the Nature Portfolio [guidelines for submitting code & software](#) for further information.

## Data

Policy information about [availability of data](#)

All manuscripts must include a [data availability statement](#). This statement should provide the following information, where applicable:

- Accession codes, unique identifiers, or web links for publicly available datasets
- A description of any restrictions on data availability
- For clinical datasets or third party data, please ensure that the statement adheres to our [policy](#)

The ChIP-Seq and RNA-seq data generated in this study have been submitted to the NCBI Gene Expression Omnibus (GEO; <https://www.ncbi.nlm.nih.gov/geo/>) under accession number GSE218538 (<https://www.ncbi.nlm.nih.gov/geo/GSE218538>). Tracks for all sequencing data can be visualized through our local genome browser ([http://bioinfo.sibs.ac.cn/LHP1\\_jbrowse/](http://bioinfo.sibs.ac.cn/LHP1_jbrowse/)). The histone ChIP-seq data of Chinese Spring (CS) seedlings used in this study are under accession numbers GSE139019 and GSE121903 in the NCBI GEO database. The H3K27me3 ChIP-seq data for *Oryza sativa* and *Arabidopsis thaliana* used in this study were downloaded from the NCBI GEO database (accession numbers GSE67322 and GSE142462). RNA-seq used in Figure 5a were obtained from NCBI SRA database (accession numbers PRJEB12358, PRJEB24686, PRJNA263755, PRJNA289545, PRJNA401295, PRJNA428316, PRJNA450087, PRJNA595999, PRJNA613349, PRJNA630776, PRJNA664832, PRJNA718488, PRJNA749387). The functional genes of *T. aestivum* were downloaded from WheatOmics (<http://wheatomics.sdau.edu.cn/genes/>). *B. distachyon* genomes were obtained from Phytozome (v12). *O. sativa* from RAP-DB85. *Z. mays* from MaizeGDB. *A. thaliana* from TAIR. *H. vulgare* and *T. turgidum* from the Plant Genomics and Phenomics Research Data Repository. *S. cereale* was obtained from the Chinese National Genomics Data Center. *T. urartu* from MBKBase. *A. tauschii* from the EnsemblPlants database (Aet\_v4.0).

## Research involving human participants, their data, or biological material

Policy information about studies with [human participants or human data](#). See also policy information about [sex, gender \(identity/presentation\), and sexual orientation](#) and [race, ethnicity and racism](#).

Reporting on sex and gender

This article does not involve human research.

Reporting on race, ethnicity, or other socially relevant groupings

This article does not involve human research.

Population characteristics

This article does not involve human research.

Recruitment

This article does not involve human research.

Ethics oversight

This article does not involve human research.

Note that full information on the approval of the study protocol must also be provided in the manuscript.

## Field-specific reporting

Please select the one below that is the best fit for your research. If you are not sure, read the appropriate sections before making your selection.

Life sciences  Behavioural & social sciences  Ecological, evolutionary & environmental sciences

For a reference copy of the document with all sections, see [nature.com/documents/nr-reporting-summary-flat.pdf](https://nature.com/documents/nr-reporting-summary-flat.pdf)

## Life sciences study design

All studies must disclose on these points even when the disclosure is negative.

Sample size

No statistics method is used to predetermine sample size for RNA-seq and ChIP-seq data. We investigated the expression and epigenetic dynamic in normal and infective condition in wild type and mutant wheat.

Data exclusions

No data was excluded from the analysis.

Replication

We have replicates for all data generated from wild type, including RNA-seq before and after pathogen treatment, H3K27me3 ChIP-seq before and after pathogen inoculation, H3K27me3 ChIP-seq in leaf protoplast, and ChIP-seq of LHP1 binding loci in leaf protoplast (Table S2). We have 2 independent mutant lines. The main results were reproduced in this study (Supplementary Figure 6-9).

Randomization

Because we did not have group allocation in this study, the randomization was not used.

Blinding

Because we did not have group allocation in this study, the blinding was not used.

## Reporting for specific materials, systems and methods

We require information from authors about some types of materials, experimental systems and methods used in many studies. Here, indicate whether each material, system or method listed is relevant to your study. If you are not sure if a list item applies to your research, read the appropriate section before selecting a response.

## Materials &amp; experimental systems

## Methods

| n/a                                 | Involvement                                            |
|-------------------------------------|--------------------------------------------------------|
| <input type="checkbox"/>            | <input checked="" type="checkbox"/> Antibodies         |
| <input checked="" type="checkbox"/> | <input type="checkbox"/> Eukaryotic cell lines         |
| <input checked="" type="checkbox"/> | <input type="checkbox"/> Palaeontology and archaeology |
| <input checked="" type="checkbox"/> | <input type="checkbox"/> Animals and other organisms   |
| <input checked="" type="checkbox"/> | <input type="checkbox"/> Clinical data                 |
| <input checked="" type="checkbox"/> | <input type="checkbox"/> Dual use research of concern  |
| <input type="checkbox"/>            | <input checked="" type="checkbox"/> Plants             |

| n/a                                 | Involvement                                     |
|-------------------------------------|-------------------------------------------------|
| <input type="checkbox"/>            | <input checked="" type="checkbox"/> ChIP-seq    |
| <input checked="" type="checkbox"/> | <input type="checkbox"/> Flow cytometry         |
| <input checked="" type="checkbox"/> | <input type="checkbox"/> MRI-based neuroimaging |

## Antibodies

|                 |                                                                                                                        |
|-----------------|------------------------------------------------------------------------------------------------------------------------|
| Antibodies used | H3K4me3: Abcam, cat #ab8580; H3K9ac: Upstate, cat #07-352; H3K27me3: Upstate-07-449; anti-Flag antibody (A2220, Sigma) |
| Validation      | The antibody has been validated by the supplier. The reports could be found on the the supplier website.               |

## Plants

|                       |                                                                                                                                                                                                                                                                                                                                                                                                                                                                               |
|-----------------------|-------------------------------------------------------------------------------------------------------------------------------------------------------------------------------------------------------------------------------------------------------------------------------------------------------------------------------------------------------------------------------------------------------------------------------------------------------------------------------|
| Seed stocks           | We used Common wheat ( <i>Triticum aestivum</i> variety JW1) in this study and generated the transgenic lines by our own.                                                                                                                                                                                                                                                                                                                                                     |
| Novel plant genotypes | We generated the transgenic lines by using CRISPR-Cas9. To modify all three TaLHP1 copies, we used two sgRNAs that target conserved regions (target1: AGGTCCTATGGCAAGCGCAA, target2: GAGCAAGCAGCAGGAGAGGT). Synthesized oligos for target-specific sgRNAs were annealed and cloned into the pBUE411 vector. After sequencing of the target sites, the binary vector was transformed into the wheat cultivar JW1 by <i>Agrobacterium tumefaciens</i> -mediated transformation. |
| Authentication        | To determine the editing efficiency, we amplified the two target sites in T0 transgenic plants for Sanger sequencing and found that the first target site was not edited, and the second target site was edited in all three subgenomes. Therefore, in the subsequent genotyping, we used Hi-TOM to detect only the second target sites.                                                                                                                                      |

## ChIP-seq

## Data deposition

- Confirm that both raw and final processed data have been deposited in a public database such as [GEO](#).
- Confirm that you have deposited or provided access to graph files (e.g. BED files) for the called peaks.

|                                                                    |                                                                                                                                                                                                                                                                                                                                                                                                                                                                                                                                                                                                                                                                                                                                                                                                                                                                                                                                                                |
|--------------------------------------------------------------------|----------------------------------------------------------------------------------------------------------------------------------------------------------------------------------------------------------------------------------------------------------------------------------------------------------------------------------------------------------------------------------------------------------------------------------------------------------------------------------------------------------------------------------------------------------------------------------------------------------------------------------------------------------------------------------------------------------------------------------------------------------------------------------------------------------------------------------------------------------------------------------------------------------------------------------------------------------------|
| Data access links<br><i>May remain private before publication.</i> | The ChIP-Seq and RNA-seq data generated in this study have been submitted to the NCBI Gene Expression Omnibus (GEO; <a href="https://www.ncbi.nlm.nih.gov/geo/">https://www.ncbi.nlm.nih.gov/geo/</a> ) under accession number GSE218538 ( <a href="https://www.ncbi.nlm.nih.gov/geo/query/acc.cgi?acc=GSE218538">https://www.ncbi.nlm.nih.gov/geo/query/acc.cgi?acc=GSE218538</a> , reviewer token: efwjeksmjbczvjj).                                                                                                                                                                                                                                                                                                                                                                                                                                                                                                                                         |
| Files in database submission                                       | JW1_Leaf_H3K4me3_rep1.rpm.bw<br>JW1_Leaf_H3K9ac_rep1.rpm.bw<br>JW1-H3K27me3-lib.sort.q20.rmdup.rpm.bw<br>JW1_rep2_H3K27me3.sort.q20.rmdup.rpm.bw<br>JW1_SR_H3K27me3_v1.sort.q20.rmdup.rpm.bw<br>JW1.wheat.sort.q20.rmdup.rrpm.bw<br>L19.wheat.sort.q20.rmdup.rrpm.bw<br>L18.wheat.sort.q20.rmdup.rrpm.bw<br>LHP1.sort.q20.rmdup.rpm.bw<br>JW1-CK-rep2.sort.q20.uniq.rpm.bw<br>JW1-SR-rep2.sort.q20.uniq.rpm.bw<br>JW1-pro-K27me3-1.sort.q20.rmdup.rpm.bw<br>JW1-pro-K27me3-2.sort.q20.rmdup.rpm.bw<br>LHP1-rep2.sort.q20.rmdup.rpm.bw<br>JW1_SR_H3K27me3_v2.sort.q20.rmdup.rpm.bw<br>featurecounts.JW1-CK-rep2.fpkms<br>featurecounts.JW1-SR-rep2.fpkms<br>JW1-pro-K27me3-1_PE_peaks.xls<br>JW1-pro-K27me3-2_PE_peaks.xls<br>LHP1-rep2_PE_peaks.xls<br>JW1_SR_H3K27me3_v2_PE_peaks.xls<br>macs2_JW1_Leaf_H3K4me3_rep1.allgenome.nomodel.nolambda_peaks.xls<br>macs2_JW1_Leaf_H3K9ac_rep1.allgenome.nomodel.nolambda_peaks.xls<br>JW1-H3K27me3-lib_PE_peaks.xls |

JW1\_rep2\_H3K27me3\_PE\_peaks.xls  
 JW1\_SR\_H3K27me3\_v1\_PE\_peaks.xls  
 JW1\_PE\_peaks.xls  
 L18\_PE\_peaks.xls  
 L19\_PE\_peaks.xls  
 LHP1\_PE\_peaks.xls  
 JW1\_Leaf\_H3K4me3\_rep1\_R1.fastq.gz  
 JW1\_Leaf\_H3K9ac\_rep1\_R1.fastq.gz  
 JW1-H3K27me3-lib\_FKDL202626447-1a\_1.fq.gz  
 JW1\_rep2\_H3K27me3\_1.fq.gz  
 JW1\_SR\_H3K27me3\_v1\_BMRC210003406-1A\_1.fq.gz  
 JW1-at-H3K27me3-lib\_BKDL210056190-1a\_1.fq.gz  
 L19-at-H3K27me3-lib\_BKDL210056192-1a\_1.fq.gz  
 L18-at-H3K27me3-lib\_BKDL210056191-1a\_1.fq.gz  
 LHP1\_1.fq.gz  
 JW1\_Leaf\_H3K4me3\_rep1\_R2.fastq.gz  
 JW1\_Leaf\_H3K9ac\_rep1\_R2.fastq.gz  
 JW1-H3K27me3-lib\_FKDL202626447-1a\_2.fq.gz  
 JW1\_rep2\_H3K27me3\_2.fq.gz  
 JW1\_SR\_H3K27me3\_v1\_BMRC210003406-1A\_2.fq.gz  
 JW1-at-H3K27me3-lib\_BKDL210056190-1a\_2.fq.gz  
 L19-at-H3K27me3-lib\_BKDL210056192-1a\_2.fq.gz  
 L18-at-H3K27me3-lib\_BKDL210056191-1a\_2.fq.gz  
 LHP1\_2.fq.gz

Genome browser session  
(e.g. [UCSC](#))

Tracks for all sequencing data can be visualized through our local genome browser ([http://bioinfo.sibs.ac.cn/LHP1\\_jbrowse/](http://bioinfo.sibs.ac.cn/LHP1_jbrowse/)).

## Methodology

Replicates

Line lhp1-abd-18 and line lhp1-abd-19 are used to verify the replication of experiment.

Sequencing depth

All ChIP-seq reads were paired-end 150bp. The number of raw read bases were show below:

JW1-H3K27me3-rep1 16323877200  
 JW1-H3K27me3-spikein 14831527800  
 JW1-H3K27me3-rep2 30895063800  
 JW1-H3K27me3-SR 11426997900  
 L18-H3K27me3-spikein 14892403200  
 L19-H3K27me3-spikein 20526692100  
 JW1-LHP1 12563000700  
 JW1-H3K4me3 12055039800  
 JW1-H3K9ac 13538327400  
 JW1-H3K27me3-SR-rep2 9587851200  
 JW1H3K27me3-protoplast-rep1 11769975000  
 JW1H3K27me3-protoplast-rep2 10642856400  
 LHP1-rep2 8446163700

Antibodies

H3K4me3: Abcam, cat #ab8580; H3K9ac: Upstate, cat #07-352; H3K27me3:Upstate-07-449; anti-Flag antibody (A2220, Sigma)

Peak calling parameters

MACS2 was used with parameters: "-f BAMPE -g 14271578887 --nomodel --nolambda", FDR < 0.05 and P value < 1e-10.

Data quality

The Peaks numbers of the ChIP-seq generated in this article are listed below:

JW1-H3K27me3-rep1 189643  
 JW1-H3K27me3-spikein 314231  
 JW1-H3K27me3-rep2 273663  
 JW1-H3K27me3-SR 123925  
 L18-H3K27me3-spikein 193897  
 L19-H3K27me3-spikein 215978  
 JW1-LHP1 85726  
 JW1-H3K4me3 164274  
 JW1-H3K9ac 107068  
 JW1H3K27me3-protoplast-rep1 7972  
 JW1H3K27me3-protoplast-rep2 3909  
 LHP1-rep2 29869  
 JW1-H3K27me3-SR-rep2 85803

Software

fastp (version 0.20.0); Trim Galore (version 0.4.4); Burrows–Wheeler Aligner (version 0.7.17-r1188); MACS (version 2.2.6); MAnorm2 (version 1.0.0)
